# Supplementary material for: Machine Learning-Based Prediction of Lymphovascular Invasion in Superficial Esophageal Carcinoma: Model Development and Risk Factor Analysis
Source: Research Square preprint supplement (doi:10.21203/rs.3.rs-6591573/v1), 2025-05-13
Supplement: Supplementary file 1 [file 60e9bc94b0f55c1c62c33efd.docx]

**Lasso Coefficient Table**

| name | MMSE Coefficient | SEₘᵢₙ₋d Coefficient |
| --- | --- | --- |
| Age | 0.0 | 0.0 |
| Sex | 0.0 | 0.0 |
| BMI | 0.0 | 0.0 |
| Hypertension | -0.046 | 0.0 |
| Diabetes mellitus | 0.0 | 0.0 |
| Cardiac disease | 0.266 | 0.0 |
| Chronic kidney disease | 0.0 | 0.0 |
| COPD | 0.277 | 0.0 |
| Smoking history | 0.0 | 0.0 |
| Alcohol consumption | 0.156 | 0.0 |
| Family history | -0.314 | 0.0 |
| PLR | 0.417 | 0.022 |
| PNR | -0.157 | 0.0 |
| NLR | 0.418 | 0.083 |
| Thickness | 0.883 | 0.712 |
| EOM findings | 0.631 | 0.384 |
| NBI | 0.176 | 0.0 |
| Esophageal stricture | 0.067 | 0.0 |
| Tumor diamete | 0.452 | 0.161 |
| Multiple lesions | 1.298 | 0.984 |
| CIP | 0.432 | 0.257 |
| Preoperative pathology | 0.714 | 0.178 |
| Pickled food intake | 0.664 | 0.165 |
| Chronic esophagitis | 0.362 | 0.0 |
| Tumor enhancement | -0.428 | 0.0 |
| Paris classification | 0.0 | 0.0 |
| Lesion location | 0.144 | 0.0 |
| High-temperature food intake | 0.042 | 0.0 |
| Fried food intake | 0.0 | 0.0 |
| Fruit/vegetable intake | 0.0 | 0.0 |
| Oral hygiene | -0.078 | 0.0 |

**Summary of Classification Results for Multiple Models on Training Set**

| name | AUC | cutoff | Accuracy | Sensitivity | Specificity | PPV | NPV | F1 Score | Kappa |
| --- | --- | --- | --- | --- | --- | --- | --- | --- | --- |
| logistic | 0.882 (0.823-0.942) | 0.161(0.142-0.180) | 0.869(0.857-0.880) | 0.845(0.827-0.863) | 0.872(0.857-0.887) | 0.457(0.432-0.482) | 0.978(0.976-0.980) | 0.591(0.574-0.609) | 0.522(0.500-0.544) |
| XGBoost | 0.990 (0.984-0.996) | 0.166(0.141-0.191) | 0.931(0.924-0.939) | 0.993(0.988-0.999) | 0.924(0.914-0.933) | 0.623(0.596-0.650) | 0.999(0.998-1.000) | 0.765(0.746-0.784) | 0.727(0.704-0.750) |
| LightGBM | 0.986 (0.978-0.994) | 0.169(0.153-0.185) | 0.92(0.915-0.926) | 0.993(0.988-0.999) | 0.911(0.905-0.917) | 0.585(0.568-0.602) | 0.999(0.998-1.000) | 0.736(0.723-0.749) | 0.693(0.677-0.708) |
| RandomForest | 0.991 (0.985-0.997) | 0.219(0.197-0.242) | 0.937(0.931-0.943) | 0.995(0.990-1.000) | 0.93(0.923-0.937) | 0.643(0.620-0.666) | 0.999(0.999-1.000) | 0.781(0.764-0.797) | 0.746(0.727-0.766) |
| AdaBoost | 0.879 (0.828-0.931) | 0.49(0.490-0.490) | 0.825(0.815-0.835) | 0.838(0.824-0.853) | 0.824(0.812-0.835) | 0.375(0.360-0.390) | 0.976(0.974-0.978) | 0.518(0.504-0.531) | 0.43(0.412-0.447) |
| DecisionTree | 0.992 (0.987-0.997) | 0.212(0.194-0.229) | 0.944(0.940-0.947) | 1.0(1.000-1.000) | 0.936(0.933-0.940) | 0.664(0.652-0.677) | 1.0(1.000-1.000) | 0.798(0.789-0.807) | 0.767(0.756-0.777) |
| GBDT | 0.970 (0.955-0.985) | 0.138(0.116-0.160) | 0.899(0.883-0.914) | 0.945(0.924-0.965) | 0.893(0.873-0.913) | 0.534(0.493-0.574) | 0.992(0.990-0.995) | 0.679(0.649-0.710) | 0.625(0.588-0.663) |
| GNB | 0.876 (0.820-0.932) | 0.122(0.105-0.139) | 0.828(0.819-0.838) | 0.842(0.829-0.855) | 0.826(0.815-0.838) | 0.38(0.365-0.394) | 0.977(0.975-0.978) | 0.523(0.510-0.536) | 0.436(0.419-0.453) |
| CNB | 0.686 (0.607-0.765) | 0.498(0.494-0.501) | 0.661(0.646-0.675) | 0.663(0.649-0.677) | 0.66(0.642-0.678) | 0.197(0.192-0.203) | 0.94(0.939-0.941) | 0.304(0.297-0.310) | 0.159(0.150-0.169) |

**Summary of Classification Results for Multiple Models on Validation Set**

| name | AUC | cutoff | Accuracy | Sensitivity | Specificity | PPV | NPV | F1 Score | Kappa |
| --- | --- | --- | --- | --- | --- | --- | --- | --- | --- |
| logistic | 0.865 (0.697-0.998) | 0.161(0.142-0.180) | 0.845(0.810-0.879) | 0.769(0.695-0.843) | 0.854(0.813-0.895) | 0.43(0.328-0.533) | 0.968(0.960-0.977) | 0.537(0.456-0.618) | 0.458(0.362-0.553) |
| XGBoost | 0.826 (0.655-0.984) | 0.166(0.141-0.191) | 0.845(0.814-0.875) | 0.571(0.470-0.672) | 0.878(0.854-0.903) | 0.382(0.293-0.472) | 0.943(0.929-0.956) | 0.456(0.361-0.551) | 0.371(0.261-0.481) |
| LightGBM | 0.842 (0.694-0.983) | 0.169(0.153-0.185) | 0.841(0.809-0.874) | 0.667(0.583-0.750) | 0.863(0.832-0.894) | 0.394(0.321-0.467) | 0.954(0.942-0.966) | 0.491(0.415-0.567) | 0.407(0.316-0.498) |
| RandomForest | 0.820 (0.643-0.987) | 0.219(0.197-0.242) | 0.843(0.816-0.870) | 0.574(0.452-0.695) | 0.877(0.847-0.906) | 0.375(0.311-0.440) | 0.944(0.928-0.959) | 0.445(0.369-0.522) | 0.361(0.274-0.448) |
| AdaBoost | 0.846 (0.683-0.987) | 0.49(0.490-0.490) | 0.796(0.758-0.834) | 0.724(0.631-0.816) | 0.805(0.760-0.849) | 0.334(0.267-0.401) | 0.96(0.948-0.972) | 0.448(0.380-0.517) | 0.349(0.269-0.429) |
| DecisionTree | 0.744 (0.538-0.945) | 0.212(0.194-0.229) | 0.85(0.818-0.882) | 0.593(0.503-0.683) | 0.882(0.853-0.912) | 0.406(0.321-0.490) | 0.945(0.931-0.959) | 0.475(0.394-0.556) | 0.394(0.297-0.491) |
| GBDT | 0.866 (0.720-0.995) | 0.138(0.116-0.160) | 0.835(0.794-0.876) | 0.71(0.609-0.810) | 0.85(0.801-0.898) | 0.398(0.328-0.469) | 0.96(0.948-0.971) | 0.497(0.426-0.568) | 0.413(0.329-0.497) |
| GNB | 0.858 (0.694-0.996) | 0.122(0.105-0.139) | 0.806(0.762-0.850) | 0.786(0.665-0.906) | 0.809(0.757-0.860) | 0.367(0.272-0.462) | 0.969(0.954-0.985) | 0.486(0.394-0.578) | 0.393(0.285-0.501) |
| CNB | 0.663 (0.429-0.892) | 0.498(0.494-0.501) | 0.647(0.604-0.690) | 0.59(0.481-0.700) | 0.654(0.597-0.712) | 0.178(0.153-0.204) | 0.93(0.915-0.944) | 0.27(0.234-0.306) | 0.122(0.083-0.160) |

**Results of Machine Learning with Logistic Regression**

| name | AUC | cutoff | Accuracy | Sensitivity | Specificity | PPV | NPV | F1 Score |
| --- | --- | --- | --- | --- | --- | --- | --- | --- |
| Training Set | 0.871 | 0.184 | 0.890 | 0.818 | 0.900 | 0.519 | 0.974 | 0.635 |
| Validation Set | 0.852 | 0.184 | 0.862 | 0.691 | 0.885 | 0.451 | 0.956 | 0.536 |
| Test Set | 0.902 | 0.184 | 0.831 | 0.778 | 0.838 | 0.35 | 0.971 | 0.483 |
